# Supplementary material for: Daratumumab with or without chemotherapy in relapsed and refractory acute lymphoblastic leukemia. A retrospective observational Campus ALL study
Source: PubMed Central journal article supplement — Haematologica. 2022 Jan 13;107(4):996–9. doi: 10.3324/haematol.2021.279851 (PMC8968887; doi:10.3324/haematol.2021.279851), 2022-01-13

## Daratumumab with or without chemotherapy in relapsed and refractory acute lymphoblastic leukemia. A retrospective observational Campus ALL study

Marco Cerrano,<sup>1</sup> Massimiliano Bonifacio,<sup>2,3</sup> Matteo Olivi,<sup>1,4</sup> Antonio Curti,<sup>5</sup> Michele Malagola,<sup>6</sup> Michelina Dargenio,<sup>7</sup> Anna Maria Scattolin,<sup>8</sup> Cristina Papayannidis,<sup>5</sup> Fabio Forghieri,<sup>9</sup> Carmela Gurrieri,<sup>10</sup> Ilaria Tanasi,<sup>2,3</sup> Patrizia Zappasodi,<sup>11</sup> Roberta La Starza,<sup>12</sup> Nicola Stefano Fracchiolla,<sup>13</sup> Patrizia Chiusolo,<sup>14,15</sup> Luisa Giaccone,<sup>4,16</sup> Maria Iliaria Del Principe,<sup>17</sup> Fabio Giglio,<sup>18</sup> Marzia Defina,<sup>19</sup> Claudio Favre,<sup>20</sup> Carmelo Rizzari,<sup>21</sup> Barbara Castella,<sup>22</sup> Giovanni Pizzolo,<sup>2,3</sup> Felicetto Ferrara,<sup>23</sup> Sabina Chiaretti<sup>24</sup> and Robin Foà<sup>24</sup>

<sup>1</sup>Divisione di Ematologia, Dipartimento di Oncologia, AOU Città della Salute e della Scienza, Torino; <sup>2</sup>UOC di Ematologia, Azienda Ospedaliera Universitaria Integrata di Verona, Verona; <sup>3</sup>Dipartimento di Medicina, Sezione di Ematologia, Università di Verona, Verona; <sup>4</sup>Dipartimento di Biotecnologie Molecolari e Scienze per la Salute, Università di Torino, Torino; <sup>5</sup>IRCCS Azienda Ospedaliero-Universitaria di Bologna, Istituto di Ematologia "Seràgnoli", Bologna; <sup>6</sup>Università di Brescia, Unità Operativa di Ematologia e Centro Trapianti, ASST Spedali Civili di Brescia, Brescia; <sup>7</sup>Unità Operativa di Ematologia e Trapianto, Ospedale Vito Fazzi, Lecce; <sup>8</sup>Unità Operativa di Ematologia e Trapianto, Ospedale dell'Angelo, Mestre; <sup>9</sup>Unità Operativa Complessa di Ematologia, Azienda Ospedaliero-Universitaria di Modena, Modena; <sup>10</sup>UO Ematologia ed Immunologia Clinica, Azienda Ospedale-Università Padova, Padova; <sup>11</sup>Unità Operativa di Ematologia, Fondazione IRCCS Policlinico San Matteo, Pavia; <sup>12</sup>Unità Operativa di Ematologia e Trapianto, AOU-Ospedale S. Maria della Misericordia, Perugia; <sup>13</sup>UOC Ematologia Fondazione IRCCS Ca' Granda - Ospedale Maggiore Policlinico, Milano; <sup>14</sup>Dipartimento di Diagnostica per Immagini, Radioterapia Oncologica ed Ematologia, Fondazione Policlinico Universitario A. Gemelli IRCCS, Roma; <sup>15</sup>Sezione di Ematologia, Dipartimento di Scienze Radiologiche ed Ematologiche, Università Cattolica del Sacro Cuore, Roma; <sup>16</sup>Unità di Trapianto Allogeneico di Cellule Staminali, Dipartimento di Oncologia, A.O.U. Città della Salute e della Scienza, Torino; <sup>17</sup>Ematologia, Dipartimento di Biomedicina e Prevenzione, Università di Roma Tor Vergata, Roma; <sup>18</sup>Unità Operativa di Ematologia e Trapianto di Midollo Osseo, IRCCS Ospedale San Raffaele, Milano; <sup>19</sup>Unità Operativa Complessa di Ematologia, AOUS, Università di Siena, Siena; <sup>20</sup>Unità Operativa di Oncologia ed Ematologia Pediatrica, Ospedale Pediatrico Meyer, Firenze; <sup>21</sup>Unità Operativa di Ematologia Pediatrica, Università di Milano-Bicocca, Fondazione MBBM, Monza; <sup>22</sup>Laboratorio Analisi, AO S. Croce e Carle, Cuneo; <sup>23</sup>UOC di Ematologia, AORN Cardarelli, Napoli and <sup>24</sup>Ematologia, Dipartimento di Medicina Traslationale e di Precisione, Università Sapienza, Roma, Italy

Correspondence:

MARCO CERRANO - [cerranomarco@gmail.com](mailto:cerranomarco@gmail.com)

ROBIN FOÀ - [rfoa@bce.uniroma1.it](mailto:rfoa@bce.uniroma1.it)

doi:10.3324/haematol.2021.279851

# **Daratumumab with or without chemotherapy in Relapsed and Refractory Acute Lymphoblastic Leukemia. A Retrospective Observational Campus ALL Study**

Marco Cerrano, Massimiliano Bonifacio, Matteo Olivi, Antonio Curti, Michele Malagola, Michelina Dargenio, Anna Maria Scattolin, Cristina Papayannidis, Fabio Forghieri, Carmela Gurrieri, Ilaria Tanasi, Patrizia Zappasodi, Roberta La Starza, Nicola Stefano Fracchiolla, Patrizia Chiusolo, Luisa Giaccone, Maria Ilaria Del Principe, Fabio Giglio, Marzia Defina, Claudio Favre, Carmelo Rizzari, Barbara Castella, Giovanni Pizzolo, Felicetto Ferrara, Sabina Chiaretti, Robin Foà

## **Supplementary Appendix**

**Supplementary Tables: pages 2, 3**

**Supplementary Figure: page 4**

**Supplementary Table 1. Chemotherapy regimens used with daratumumab in a subset of patients**

| <b>Type of chemotherapy</b>  | <b>Number of patients</b> |
|------------------------------|---------------------------|
| Cyclophosphamide pre-phase   | 2                         |
| Cyclophosphamide-clofarabine | 1                         |
| Vincristine                  | 1                         |
| Vincristine + daunorubicin   | 1                         |
| Cytarabine + etoposide       | 2                         |
| Peg-asparaginase             | 1                         |
| Doxorubicin                  | 1                         |

**Supplementary Table 2. Characteristics of responding patients**

| Sex | Age | Disease | Previous allo-HCT | Previous lines | Type of relapse                                  | WBC x 10 <sup>9</sup> /l | BM blasts (%) | ECOG | Concomitant treatment | Response to DARA | Allo-HCT post DARA | DOR, months | N of infusions | Relapse   | Alive | Status           |
|-----|-----|---------|-------------------|----------------|--------------------------------------------------|--------------------------|---------------|------|-----------------------|------------------|--------------------|-------------|----------------|-----------|-------|------------------|
| M   | 44  | ETP     | Yes               | 1              | CR MRD positive                                  | 3.3                      | 3             | 0    | no                    | CR MRD negative  | No                 | 23          | 58             | Yes (MRD) | Yes   | CR, MRD negative |
| M   | 26  | ETP     | No                | 1              | Extramedullary (lymph nodes) + BM MRD positivity | 4.3                      | 1.4           | 1    | no                    | CR MRD positive* | No                 | 3           | 11             | Yes       | No    | Relapse          |
| M   | 40  | B-LBL   | No                | 3              | BM overt                                         | 0.3                      | 78            | 0    | CLOFA - CTX           | CR MRD negative  | Yes                | 3           | 2              | No        | No    | TRM              |
| M   | 24  | T-ALL   | Yes               | 2              | Extramedullary                                   | 3                        | 0             | 1    | no                    | PR <sup>o</sup>  | Yes                | 3           | 4              | No        | Yes   | CR, MRD negative |

\*This patient obtained a complete resolution of pathological lymphadenopathies and a 3-log MRD reduction, which nonetheless remained positive; <sup>o</sup> Only CT scan evaluation is available

Allo-HCT: allogeneic hematopoietic cell transplant BM: bone marrow; CLOFA: clofarabine; CR: complete remission; CTX: cyclophosphamide; DARA: daratumumab; DOR: duration of response; ETP: early-T precursors; LBL: lymphoblastic lymphoma; MRD: measurable residual disease; neg: negative; PB: peripheral blood; TRM: treatment-related mortality; WBC: white blood cells

**Supplementary Figure 1. Overall survival from the start of daratumumab**

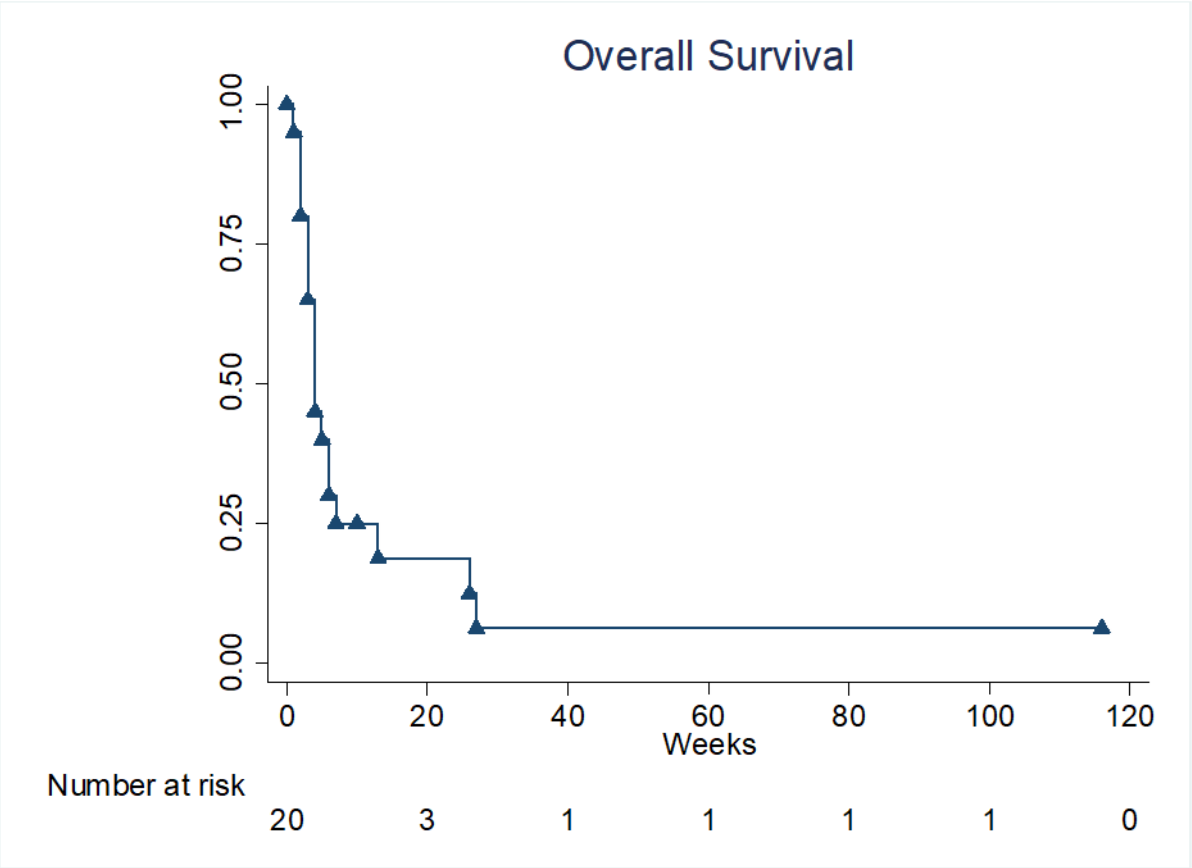

Supplement: 2021_279851_CERRANO_SUPPL.pdf [file 2021_279851_CERRANO_SUPPL.pdf]
